# Supplementary material
Source: Springer Nature journal article supplement (https://www.springermedizin.de/resource/supplementary/12914_2009_118_MOESM1_ESM.pdf/9536802)

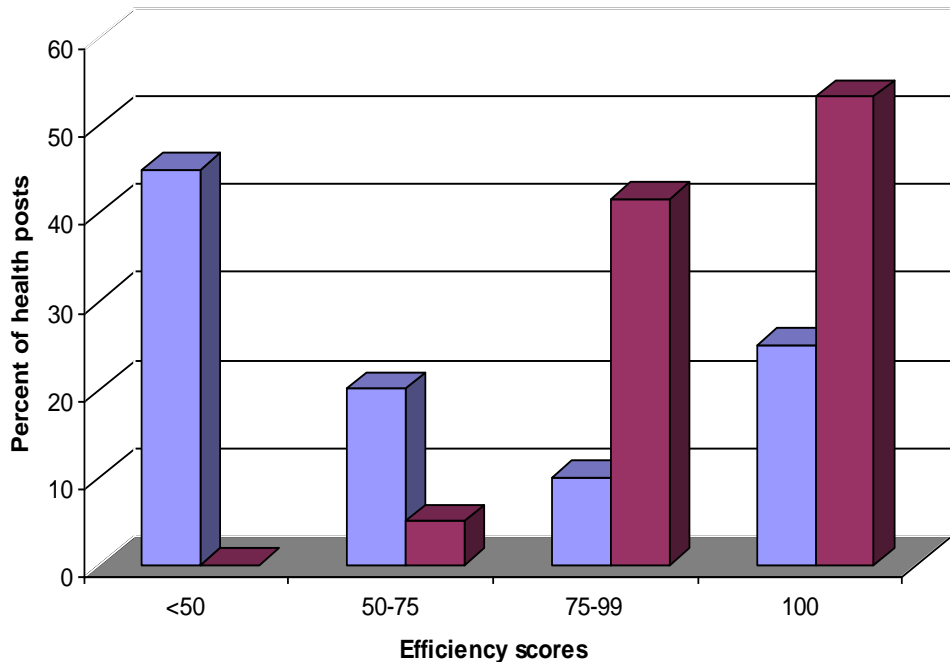

■ Technical efficiency ■ Scale efficiency

Supplement: MOESM1 [file 9536802]
